# Supplementary material for: Macrophage Plasticity and Polarization Are Altered in the Experimental Model of Multiple Sclerosis
Source: MDPI journal article supplement (doi:10.3390/biom11060837), 2021-06-04
Supplement: s1 [file s1]

**Supplementary Figure 1**

**A**

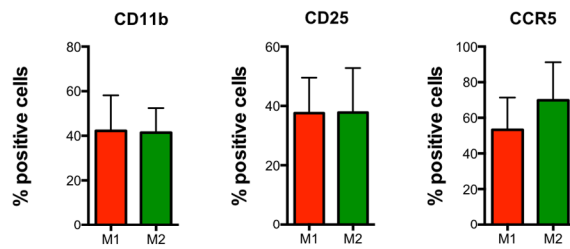

**B**

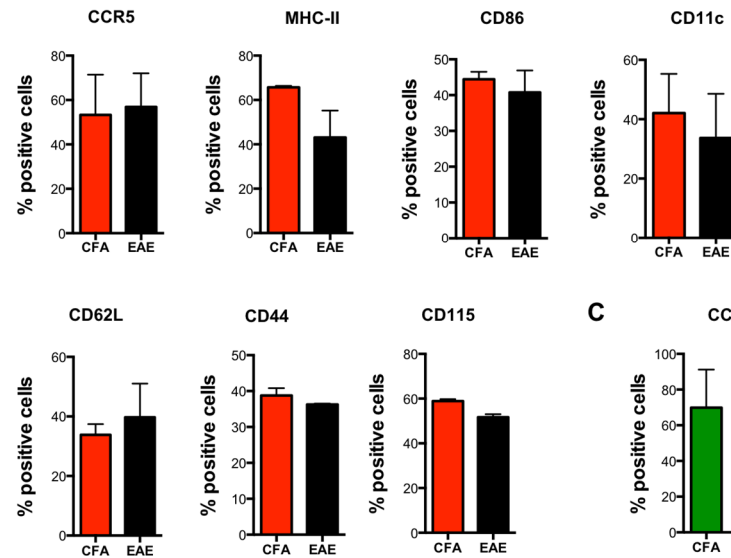

**C**

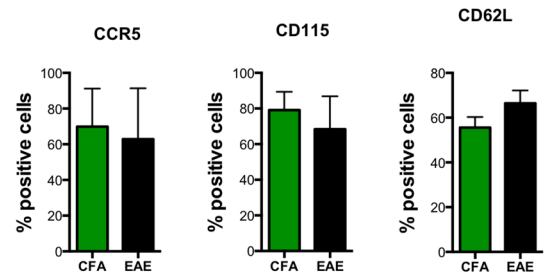

**Supplementary Fig.1. Immunophenotype of macrophages obtained from CFA and EAE mice.** (A) Expression of CD11b, CD25 and CCR5 by flow cytometry in M1 and M2 macrophages obtained from CFA mice. (B) Expression of CCR5, MHC-II, CD86, CD11c, CD62L, CD44 and CD115 by flow cytometry in M1-M $\phi$  obtained from CFA mice. (C) Expression of CCR5 and CD115 by flow cytometry in M2-M $\phi$  obtained from CFA mice. Data are reported as percentage of positive cells and are representative of eight independent experiments  $\pm$  sem.

## Supplementary Figure 2

**A**

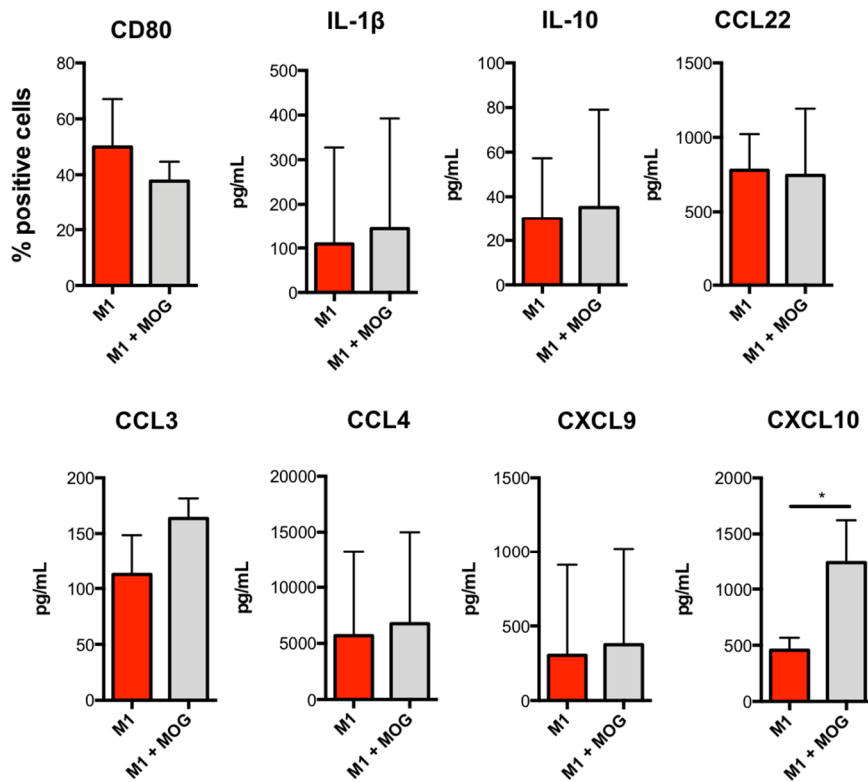

**B**

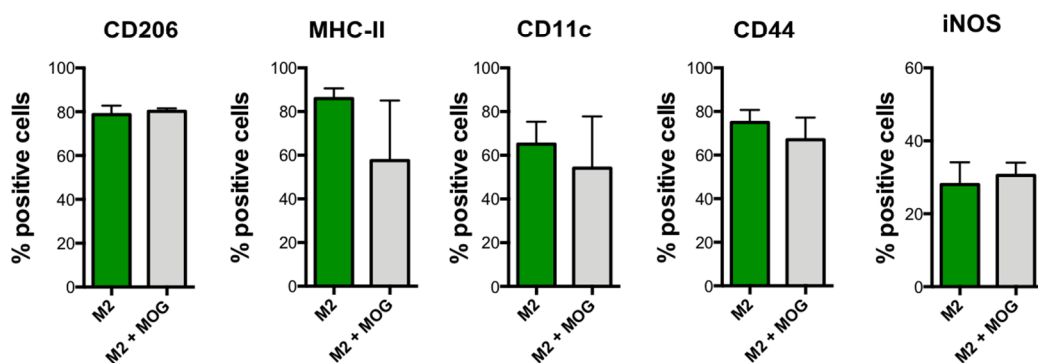

**Supplementary Fig.2. Immunophenotype of MOG-immunized M1 and M2 macrophages obtained from CFA mice.** (A) Expression of CD80 by flow cytometry and ELISA of IL-1  $\beta$ , IL-10, CCL22, CCL3, CCL4, CXCL9 and CXCL10 in MOG-immunized M1-M $\phi$  obtained from CFA mice. (B) Expression of CD206, MHC-II, CD11c, CD44 and iNOS by flow cytometry in MOG-immunized M2-M $\phi$  obtained from CFA mice. Data are reported as percentage of positive cells and are representative of eight independent experiments  $\pm$  sem.
